# Supplementary material for: Self-Reported Cognitive Functions Predict the Trajectory of Paranoid Ideation Over a 15-Year Prospective Follow-Up
Source: Springer Nature journal article supplement (doi:10.1007/s10608-020-10142-z), 2020-10-01
Supplement: MOESM1 [file 18440926]

**Supplementary Table 1.** The measurement years of the study variables.

|  | 1980 | 1997 | 2001 | | 2007 | | 2011 | 2012 | |
| --- | --- | --- | --- | --- | --- | --- | --- | --- | --- |
| Flexibility |  | X |  |  | |  | | |  |
| Task orientation |  | X |  |  | |  | | |  |
| Distractibility |  | X |  |  | |  | | |  |
| Persistence |  | X |  |  | |  | | |  |
| Perseverance |  | X |  |  | |  | | |  |
| Paranoid ideation |  | X | X | X | |  | | | X |
| Parental socioeconomic factors | X |  |  |  | |  | | |  |
| Participants’ socioeconomic factors |  |  |  |  | | X | | |  |

**Supplementary Table 2.** The correlation coefficients (Pearson) between the study variables.

|  | 1. | 2. | 3. | 4. | 5. | 6. | 7. | 8. | 9. | 10. | 11. | 12. |
| --- | --- | --- | --- | --- | --- | --- | --- | --- | --- | --- | --- | --- |
| 1. Age | - |  |  |  |  |  |  |  |  |  |  |  |
| 2. Sex | 0.028 | - |  |  |  |  |  |  |  |  |  |  |
| 3. Parental education | -0.257*** | -0.051 | - |  |  |  |  |  |  |  |  |  |
| 4. Parent’s income | -0.032 | -0.050 | 0.485*** | - |  |  |  |  |  |  |  |  |
| 5. Participants' education | -0.158*** | 0.028 | 0.289*** | 0.225*** | - |  |  |  |  |  |  |  |
| 6. Participants' income | 0.035 | -0.294*** | 0.148*** | 0.205*** | 0.320*** | - |  |  |  |  |  |  |
| 7. Flexibility1 | 0.021 | -0.022 | 0.052 | 0.069* | 0.154*** | 0.209*** | - |  |  |  |  |  |
| 8. Task orientation1 | 0.001 | -0.144*** | 0.015 | 0.034 | 0.103*** | 0.135*** | 0.134*** | - |  |  |  |  |
| 9. Distractibility1 | 0.034 | 0.154*** | -0.026 | -0.042 | -0.093** | -0.133*** | -0.089** | -0.930*** | - |  |  |  |
| 10. Perseverance1 | -0.151*** | 0.224*** | 0.089** | -0.023 | 0.030 | -0.132*** | -0.283*** | -0.163*** | 0.151*** | - |  |  |
| 11. Persistence1 | 0.065* | -0.066* | -0.011 | 0.005 | 0.089** | 0.082** | 0.166*** | 0.719*** | -0.413*** | -0.119*** | - |  |
| 12. Paranoid ideation1 | -0.067* | -0.020 | -0.039 | -0.080** | -0.174*** | -0.178*** | -0.369*** | -0.157*** | 0.104*** | 0.273*** | -0.190*** | - |
| **p*<.05 ** *p*<.01 *** *p*<.001 1 We used the score of the measurement of year 1997. *N*=1213 | | | | | | | | | | | |
